# Supplementary material for: Structure–property relationships in organic battery anode materials: exploring redox reactions in crystalline Na- and Li-benzene diacrylate using combined crystallography and density functional theory calculations
Source: Royal Society of Chemistry journal article supplement (doi:10.1039/d0ma00900h), 2020-12-19
Supplement: d0ma00900h1.pdf [file d0ma00900h1.pdf]

## Supporting information

### Structure-property relationships in organic battery anode materials: exploring redox reactions in crystalline Na- and Li-benzene diacrylate using combined crystallography and density functional theory calculations

Rodrigo P. Carvalho,<sup>a,b</sup> Cleber F. N. Marchiori,<sup>b</sup> Viorica-Alina Oltean,<sup>b</sup> Stéven Renault,<sup>c</sup> Tom Willhammar,<sup>d</sup> Cesar Pay Gómez,<sup>b</sup> C. Moyses Araujo,<sup>a</sup> and Daniel Brandell<sup>b</sup>

<sup>a</sup> Department of Physics and Astronomy, Materials Theory Division, Uppsala University, 751 20, Uppsala, Sweden

<sup>b</sup> Department of Chemistry- Ångström Laboratory, Uppsala University, 751 21, Uppsala, Sweden

<sup>c</sup> Université de Nantes, CNRS, Institut des Matériaux Jean Rouxel, IMN, F-44000 Nantes, France

<sup>d</sup> Department of Materials and Environmental Chemistry, Stockholm University, 106 91, Stockholm, Sweden

**Table S1** Space group of all crystal structures as theoretically predicted.

|                                     | <b>Na<sub>2</sub>BDA</b> | <b>Li<sub>2</sub>BDA</b> |
|-------------------------------------|--------------------------|--------------------------|
| <i>Pristine</i>                     | P2 <sub>1</sub> /c       | P2 <sub>1</sub> /c       |
| <i>1<sup>st</sup> ion insertion</i> | P1                       | P $\bar{1}$              |
| <i>2<sup>nd</sup> ion insertion</i> | P2 <sub>1</sub> /c       | P $\bar{1}$              |

**Table S2** Lattice parameters of all crystal structures as theoretically predicted.

|                | <b>Na<sub>2</sub>BDA</b> | <b>Na<sub>3</sub>BDA</b> | <b>Na<sub>4</sub>BDA</b> | <b>Li<sub>2</sub>BDA</b> | <b>Li<sub>3</sub>BDA</b> | <b>Li<sub>4</sub>BDA</b> |
|----------------|--------------------------|--------------------------|--------------------------|--------------------------|--------------------------|--------------------------|
| <i>a</i> (Å)   | 13.77                    | 15.02                    | 14.03                    | 11.11                    | 13.03                    | 13.33                    |
| <i>b</i> (Å)   | 5.34                     | 5.39                     | 5.11                     | 5.36                     | 5.13                     | 5.28                     |
| <i>c</i> (Å)   | 6.89                     | 6.72                     | 8.09                     | 8.28                     | 7.57                     | 7.59                     |
| $\alpha$ (deg) | 90.01                    | 90.01                    | 90.05                    | 89.97                    | 86.84                    | 86.40                    |
| $\beta$ (deg)  | 97.31                    | 78.05                    | 76.64                    | 90.05                    | 100.15                   | 107.03                   |
| $\gamma$ (deg) | 89.95                    | 96.09                    | 90.05                    | 87.15                    | 86.80                    | 101.05                   |

**Table S3** Comparison of experimental data between the PXRD-Na<sub>2</sub>BDA and SCXRD-Li<sub>2</sub>BDA.

| <b>Parameter</b>                   | <b>Na<sub>2</sub>BDA</b> | <b>Li<sub>2</sub>BDA</b> |
|------------------------------------|--------------------------|--------------------------|
| Molar mass (g/mol)                 | 262.02                   | 230.07                   |
| Temp of measurement (K)            | 293                      | 293                      |
| Space group                        | P 2 <sub>1</sub> /c      | P 2 <sub>1</sub> /c      |
| <i>a</i> axis (Å)                  | 14.53                    | 13.75                    |
| Cell volume (Å <sup>3</sup> )      | 526.35                   | 1170.99                  |
| <i>Z</i>                           | 2                        | 4                        |
| Calc. density (g/cm <sup>3</sup> ) | 1.65429                  | 1.39586                  |
| Crystal colour                     | white                    | white                    |

The predicted lithiated phases for the  $\text{Li}_2\text{BDA}$  compound are presented on the Figure S1.

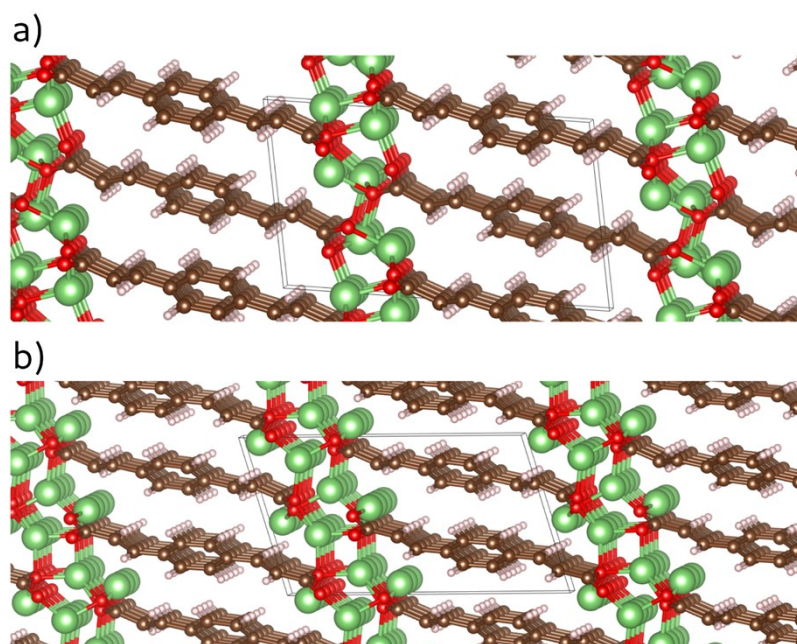

*Figure S1* The predicted crystal structure for the lithiated phases a)  $\text{Li}_3\text{BDA}$  and b)  $\text{Li}_4\text{BDA}$ .

### 3D electron diffraction

The sample was crushed in an agate mortar, dispersed in absolute ethanol. A droplet of the suspension was transferred onto a copper grid covered by a holey carbon film. The 3D electron diffraction data were collected using a JEOL JEM-2100 transmission electron microscope (TEM) operated at an accelerating voltage of 200 kV. The data were collected by continuously tilting the goniometer with a tilt speed of 0.28 °/s. During tilting the crystal was tracked by sequential defocusing of the intermediate lens using the software Instamatic.<sup>1</sup> The data were collected using the hybrid detection camera Timepix (ASI). Intensity extraction was performed using X-ray Detector Software (XDS)<sup>2</sup>. The structure was solved using the software SHELXT<sup>3</sup>, the positions of all non-hydrogen atoms were directly obtained with reasonable geometries. A least-squares refinement was performed in SHELXL<sup>4</sup> using atomic scattering factors for electrons extracted from SIR2014<sup>5</sup>. The refinement converged with an R1 of 35% without the use of restraints. Details regarding the data and structure refinement can be found in Table S4.

**Table S4.** Details of the electron diffraction data and refinement.

|                                                |                   |
|------------------------------------------------|-------------------|
| <b>Crystal system</b>                          | Monoclinic        |
| <b>Space group</b>                             | $P2_1/c$ (No. 14) |
| <b>a, Å</b>                                    | 14.49             |
| <b>b, Å</b>                                    | 5.50              |
| <b>c, Å</b>                                    | 7.21              |
| <b><math>\alpha</math>, °</b>                  | 90                |
| <b><math>\beta</math>, °</b>                   | 101.1             |
| <b><math>\gamma</math>, °</b>                  | 90                |
| <b>Volume, Å<sup>3</sup></b>                   | 563.9             |
| <b><math>\lambda</math>, Å</b>                 | 0.0251            |
| <b>Exposure time per frame (s)</b>             | 0.6               |
| <b>Tilt range, °</b>                           | -58.3 – +62.3     |
| <b>Resolution, Å</b>                           | 0.9               |
| <b>Completeness, %</b>                         | 77.2              |
| <b>R<sub>int</sub></b>                         | 0.1142            |
| <b>R1</b>                                      | 0.3535            |
| <b>No. of symmetry independent reflections</b> | 617               |
| <b>Restraints</b>                              | 0                 |

## References

- 1 M. O. Cichocka, J. Ångström, B. Wang, X. Zou and S. Smeets, *J Appl Cryst*, , DOI:10.1107/S1600576718015145.
- 2 W. Kabsch, *Acta Cryst D, Acta Cryst Sect D, Acta Crystallogr D, Acta Crystallogr Sect D, Acta Crystallogr D Biol Crystallogr, Acta Crystallogr Sect D Biol Crystallogr*, 2010, **66**, 125–132.
- 3 G. M. Sheldrick, *Acta Cryst A*, 2015, **71**, 3–8.
- 4 G. M. Sheldrick, *Acta Cryst A, Acta Cryst Sect A, Acta Crystallogr A, Acta Crystallogr Sect A, Acta Crystallogr A Found Crystallogr, Acta Crystallogr Sect A Found Crystallogr*, 2008, **64**, 112–122.
- 5 M. C. Burla, R. Caliendo, B. Carrozzini, G. L. Cascarano, C. Cuocci, C. Giacovazzo, M. Mallamo, A. Mazzone and G. Polidori, *Journal of Applied Crystallography*, 2015, **48**, 306–309.
